# Supplementary material
Source: Springer Nature journal article supplement (https://www.springermedizin.de/resource/supplementary/12963_2009_99_MOESM1_ESM.pdf/9572660)

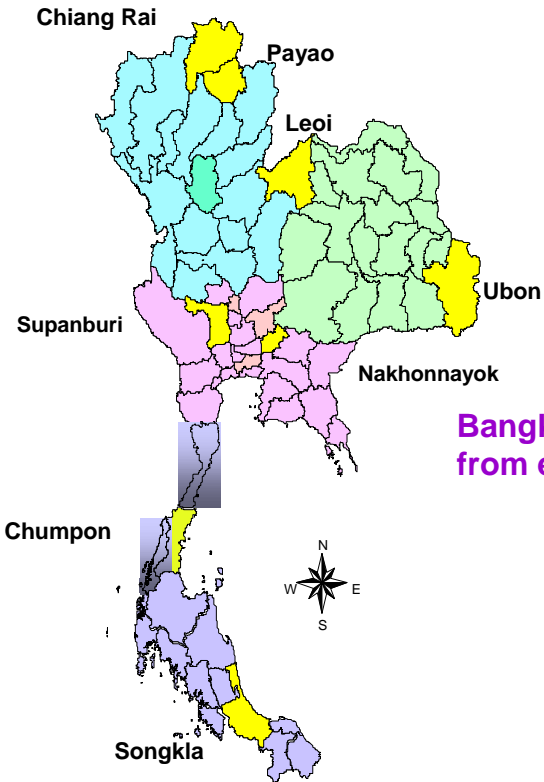

**Bangkok and 2 provinces  
from each region**

Supplement: MOESM1 [file 9572660]
